# Supplementary material for: Synthesis and antitumor activity of α-aminophosphonates containing thiazole[5,4-b]pyridine moiety
Source: Royal Society of Chemistry journal article supplement (doi:10.1039/c2ob25875g), 2012-01-01
Supplement: c2ob25875g.pdf [file c2ob25875g.pdf]

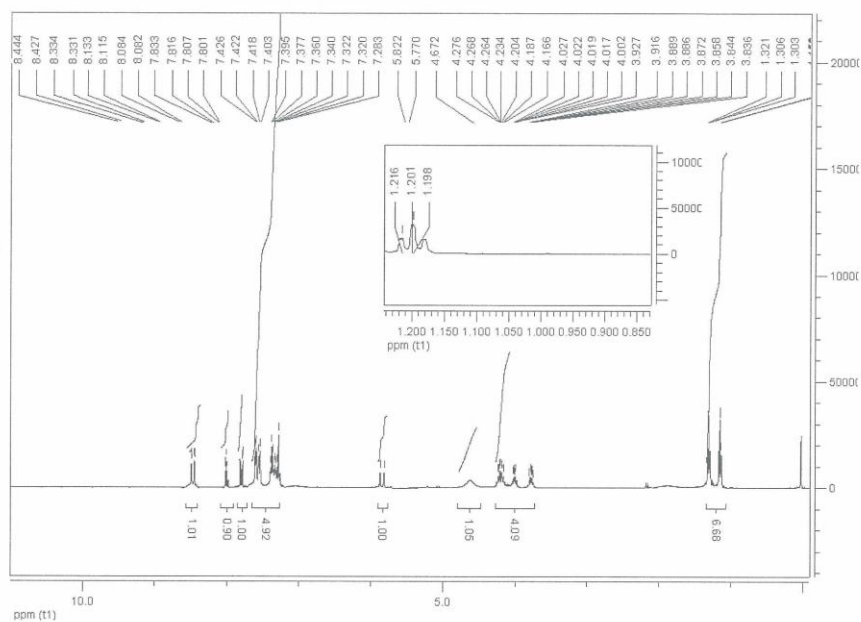

<sup>1</sup>H NMR of Compound 3a

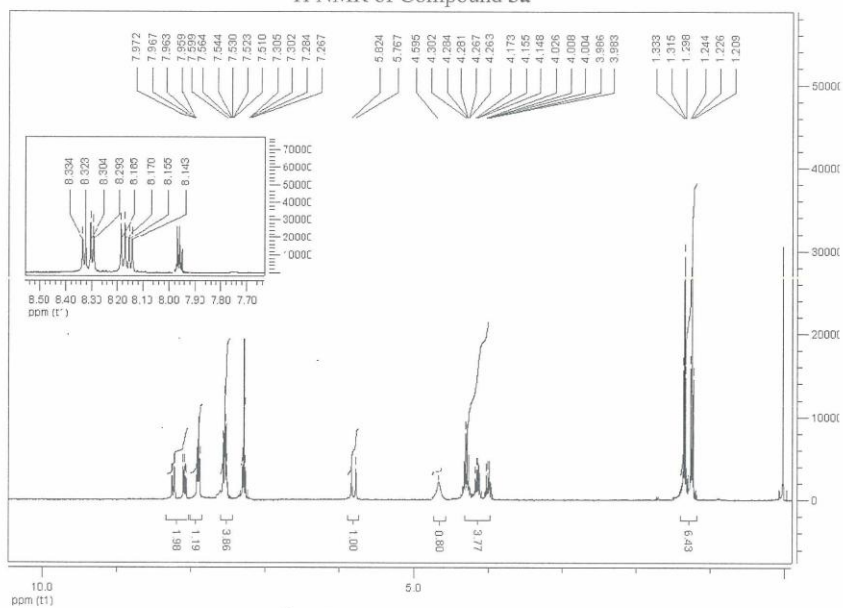

<sup>1</sup>H NMR of Compound 3b

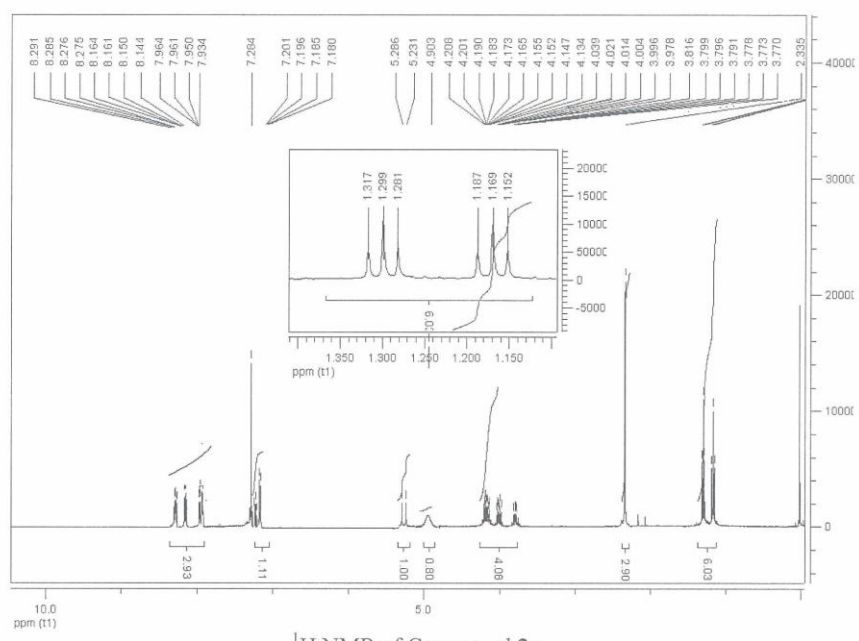

<sup>1</sup>H NMR of Compound 3c

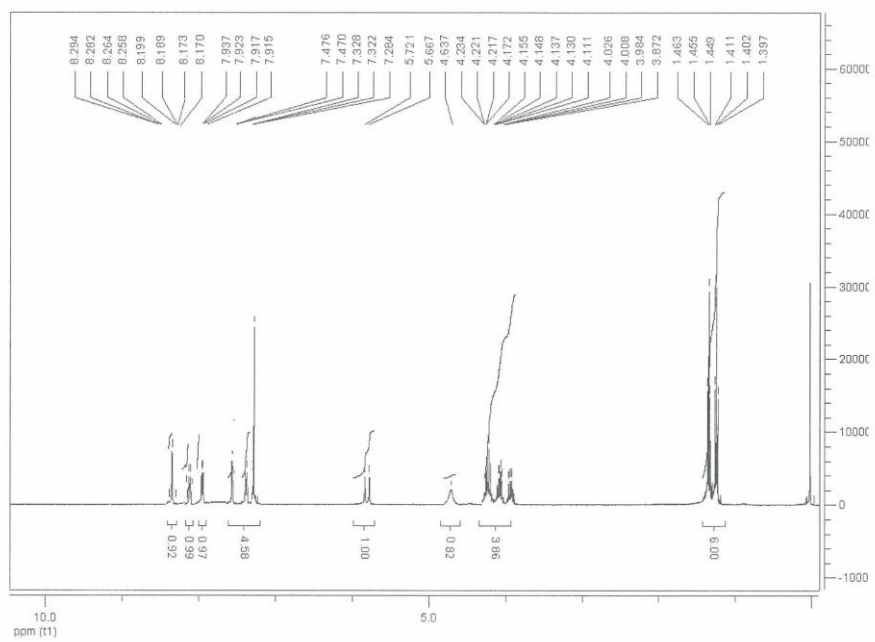

<sup>1</sup>H NMR of Compound 3d

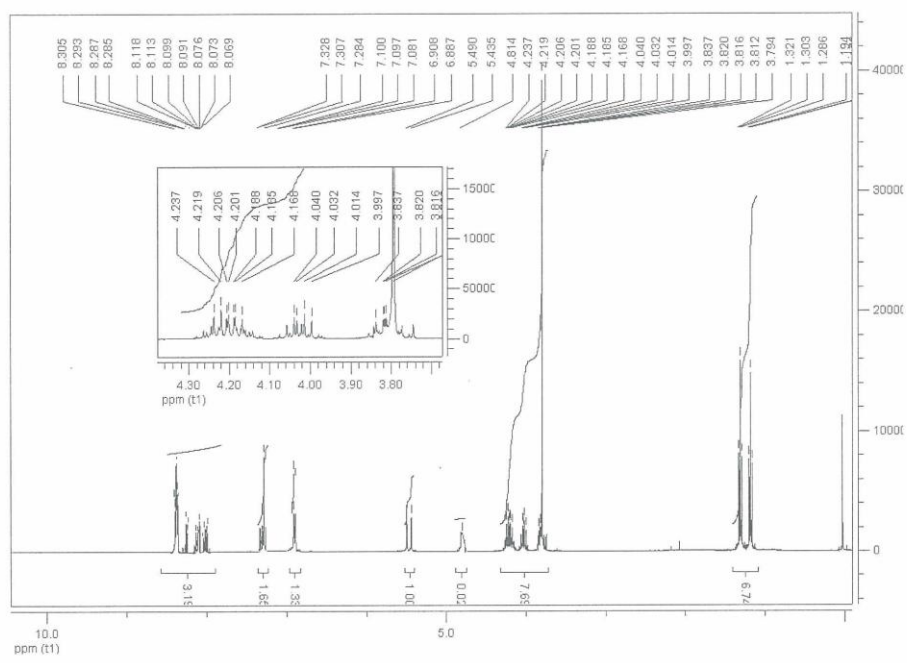

<sup>1</sup>H NMR of Compound 3e

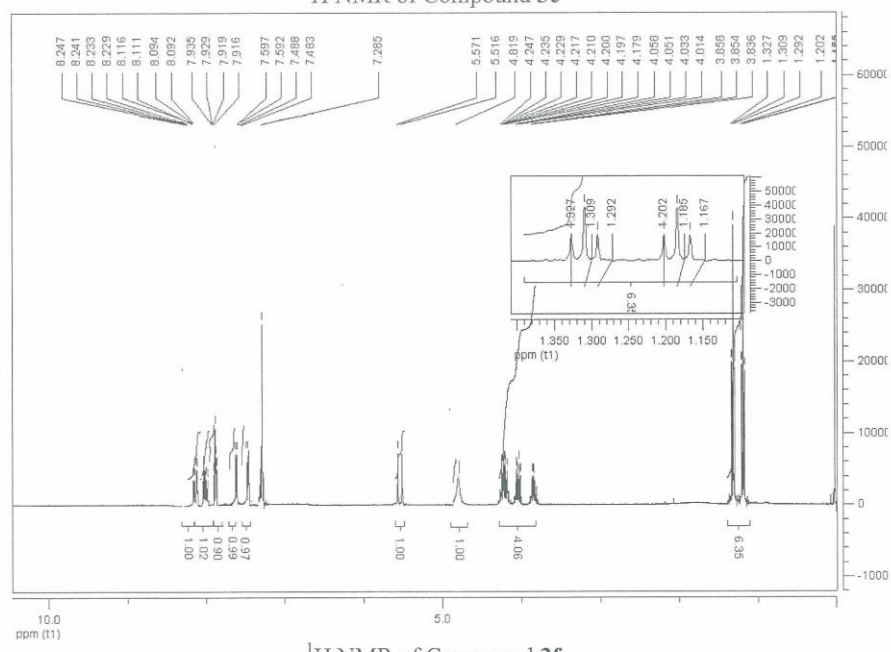

<sup>1</sup>H NMR of Compound 3f

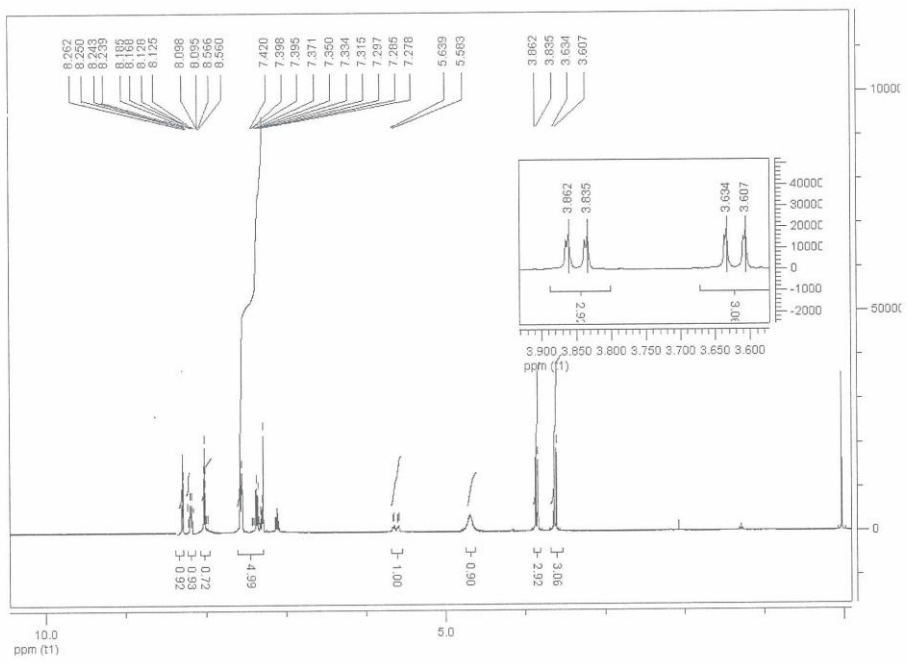

<sup>1</sup>H NMR of Compound 3g

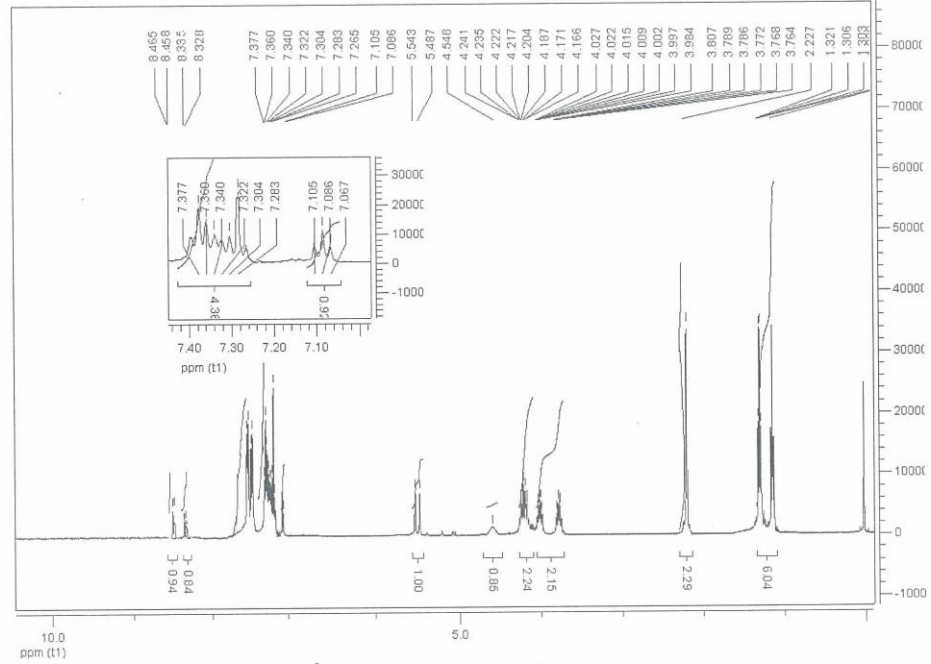

<sup>1</sup>H NMR of Compound 7

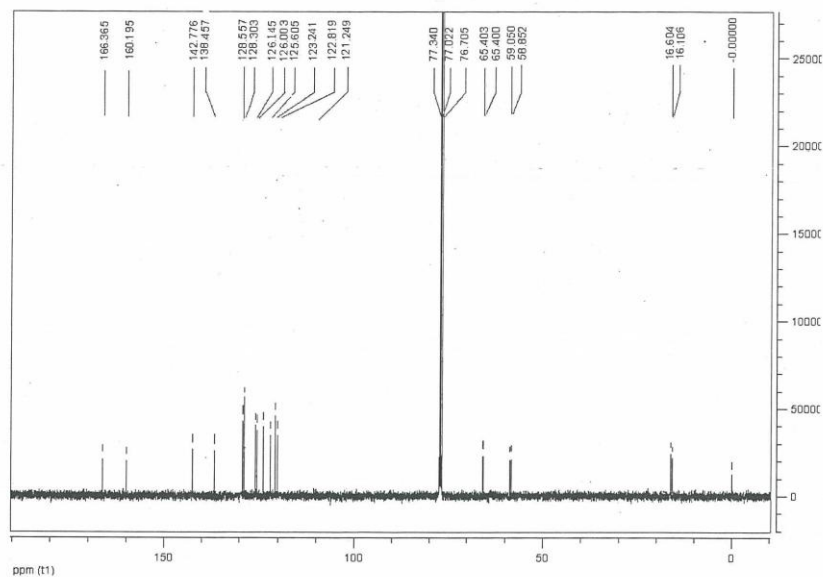

<sup>13</sup>C NMR of Compound 3a

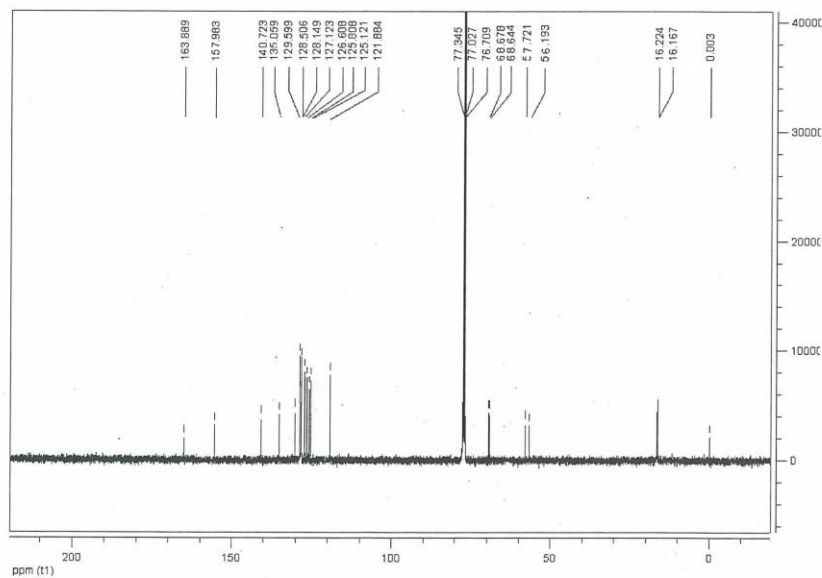

<sup>13</sup>C NMR of Compound 3b

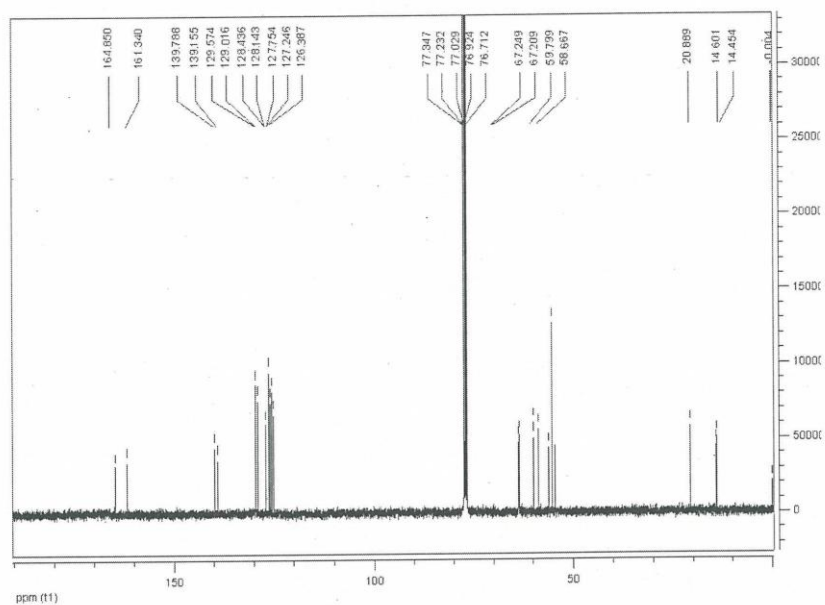

<sup>13</sup>C NMR of Compound 3c

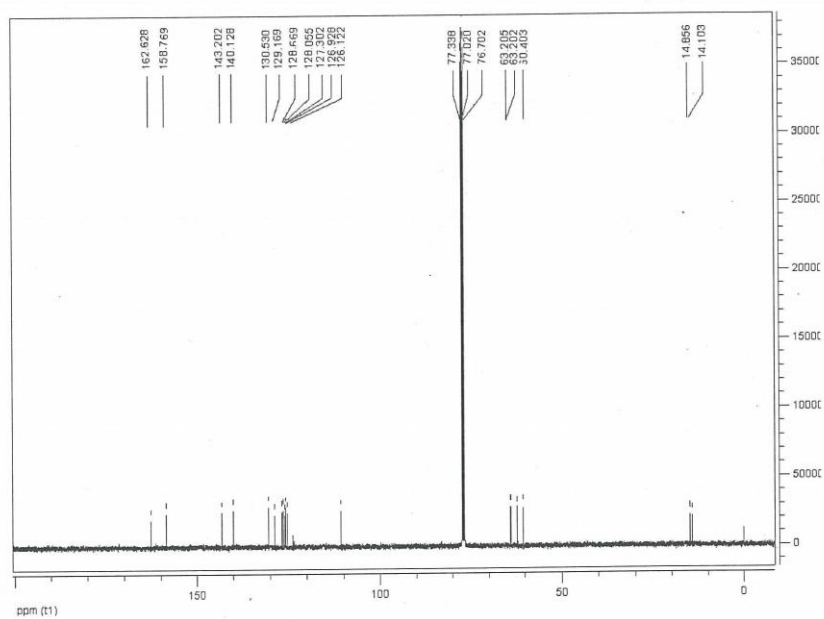

<sup>13</sup>C NMR of Compound 3d

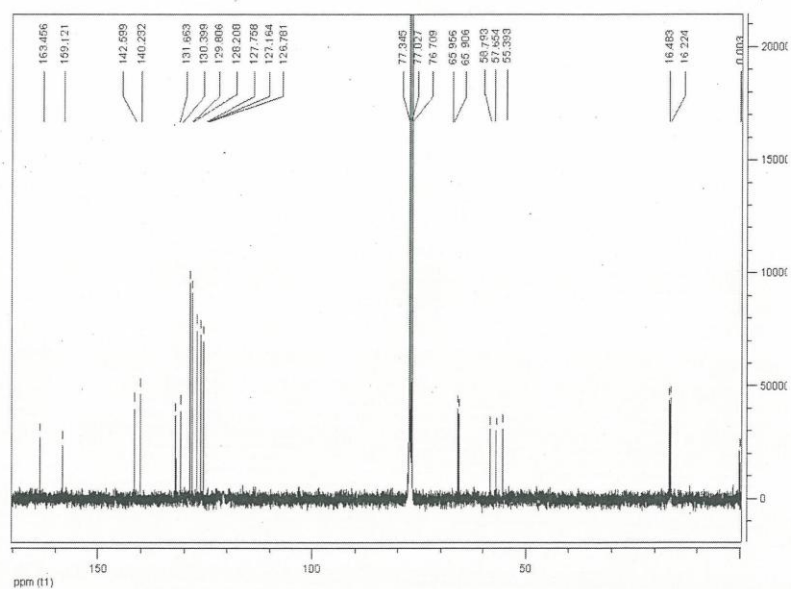

<sup>13</sup>C NMR of Compound 3e

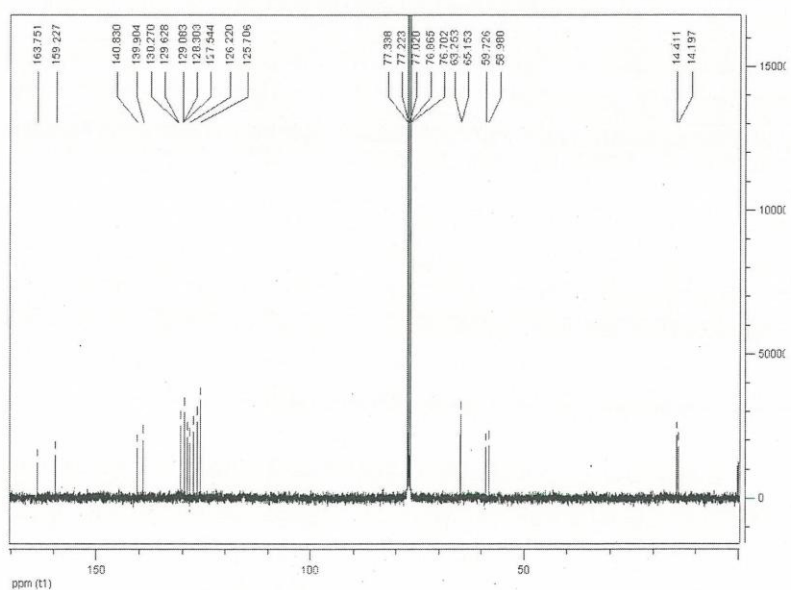

<sup>13</sup>C NMR of Compound 3f

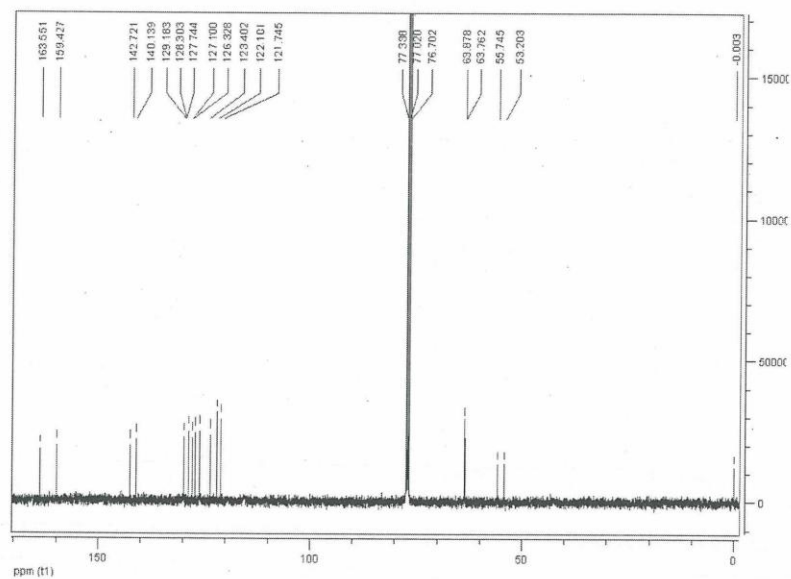

<sup>13</sup>C NMR of Compound 3g

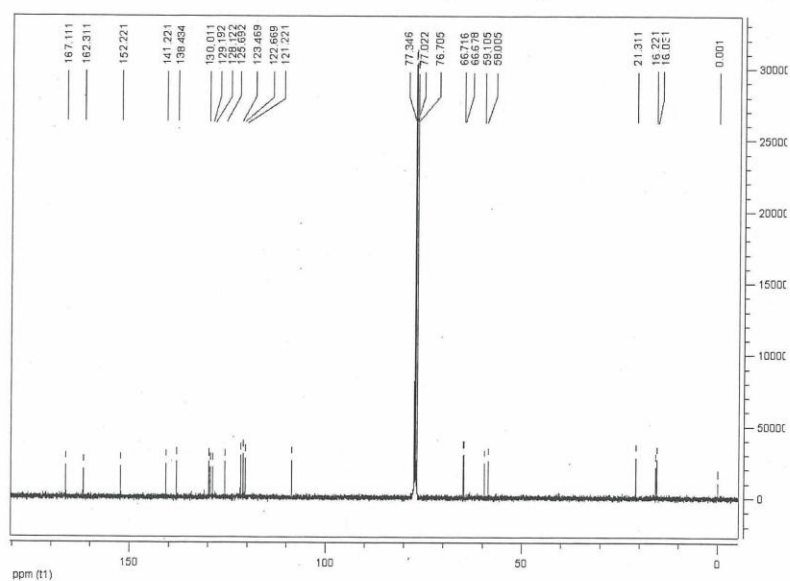

<sup>13</sup>C NMR of Compound 7



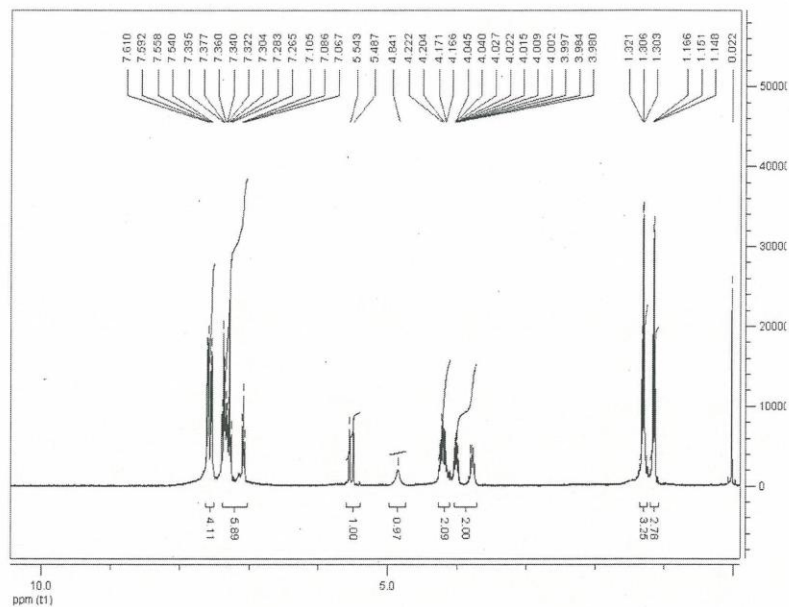

<sup>1</sup>H NMR of Compound 9

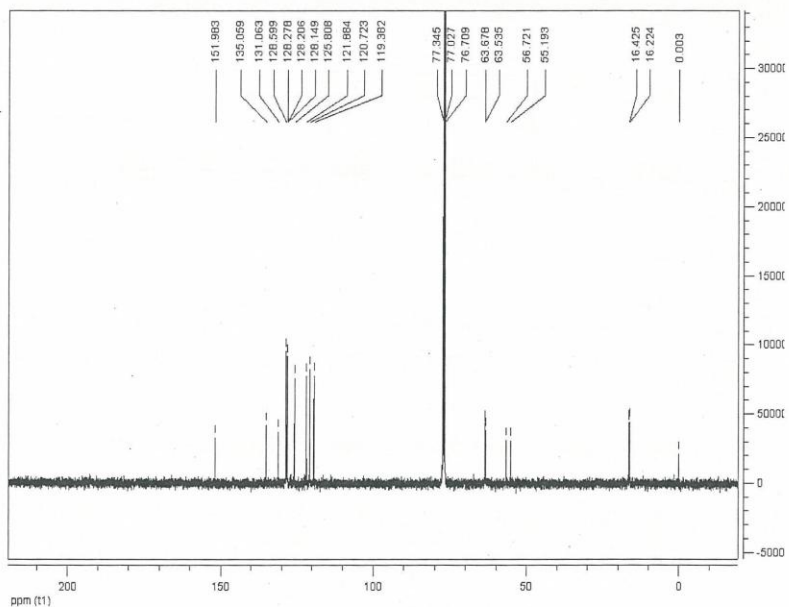

<sup>13</sup>C NMR of Compound 9
